# Supplementary material
Source: PubMed Central journal article supplement (PMC8031992)
Supplement: JCH-18-27-s001.pdf [file JCH-18-27-s001.pdf]

**Supplementary Table 1:** univariate logistic regression for albuminuria among included participants with hypertension (n=160).

| <b>Univariate Variable</b>                    | <b>Odds Ratio<br/>(95% CI)</b> | <b>p-value</b> |
|-----------------------------------------------|--------------------------------|----------------|
| Men                                           | 1.16 (0.58 - 2.32)             | 0.67           |
| Age (per year increment)                      | 1.03 (1.00 - 1.06)             | 0.04           |
| Systolic BP (per mmHg increment)              | 1.00 (0.99 - 1.02)             | 0.52           |
| Diastolic BP (per mmHg increment)             | 1.00 (0.97 - 1.03)             | 0.99           |
| Pulse pressure (per mmHg increment)           | 1.01 (0.99 - 1.03)             | 0.41           |
| Duration since diagnosis (per year increment) | 1.02 (0.99 - 1.06)             | 0.18           |
| BMI (per kg/m <sup>2</sup> increment)         | 1.02 (0.97 - 1.08)             | 0.44           |
| Waist circumference (per cm increment)        | 1.01 (0.99 - 1.03)             | 0.29           |
| HbA <sub>1c</sub> (per mmol/mol increment)    | 1.02 (1.01 - 1.04)             | <0.01          |
| DM                                            | 2.38 (1.23 - 4.62)             | 0.01           |
| Smoking                                       | 0.90 (0.08 - 10.17)            | 0.93           |
| <b>Antihypertension Therapy</b>               |                                |                |
| ACE inhibitors                                | 0.92 (0.48 - 1.75)             | 0.79           |
| Diuretics                                     | 0.71 (0.36 - 1.38)             | 0.31           |
| Beta blockers                                 | 1.12 (0.58 - 2.19)             | 0.74           |
| Dihydropyridine calcium blockers              | 2.93 (1.33 - 6.49)             | <0.01          |
| Methyldopa                                    | 0.75 (0.27 - 2.07)             | 0.58           |
| ≥ 3 antihypertension medications              | 1.09 (0.50 - 2.37)             | 0.83           |

**ACE**, angiotensin converting enzyme; **BMI**, body mass index; **BP**, blood pressure; **DM**, diabetes mellitus
