# Supplementary material
Source: PubMed Central journal article supplement (PMC8031992)
Supplement: JCH-18-27-s002.pdf [file JCH-18-27-s002.pdf]

**Supplementary Table 2:** characteristics of the hypertension participants treated with dihydropyridine calcium channel blockers (CCBs) compared with the other participants in the study.

|                                    | <b>CCB treated</b> | <b>Non CCB</b>  | <b>p-value</b> |
|------------------------------------|--------------------|-----------------|----------------|
|                                    | <b>n=32</b>        | <b>n=128</b>    |                |
| Women (n, (%))                     | 23 (71.9)          | 87 (68.0)       | 0.67           |
| Age (years)                        | 62.1 (13.3)        | 60.3 (11.2)     | 0.43           |
| Systolic BP (mmHg)                 | 154 (27)           | 147 (23)        | 0.18           |
| Diastolic BP (mmHg)                | 95 (15)            | 91 (11)         | 0.21           |
| Duration since diagnosis (years) ● | 4.5 (2.0 - 12.5)   | 4.0 (1.0 - 8.0) | 0.16           |
| HbA <sub>1c</sub> (mmol/mol)●      | 42 (37 - 54)       | 42.5 (39 - 55)  | 0.66           |
| DM (n, (%))                        | 16 (50.0)          | 52 (40.6)       | 0.34           |

All continuous variables are given as mean (SD) unless otherwise indicated.

● Median (25<sup>th</sup> – 75<sup>th</sup> percentiles)

**ACR**, albumin-creatinine-ratio; **BMI**, body mass index; **BP**, blood pressure; **DM**, diabetes mellitus
